# Supplementary material
Source: PubMed Central journal article supplement (PMC5160131)
Supplement: NIHMS739415-supplement-ESM_Table_1.pdf [file NIHMS739415-supplement-ESM_Table_1.pdf]

**ESM Table 1. Sequence information for conventional PCR primers.**

| Gene           | Product Size (bp) | Upstream Primer                 | Downstream Primer              | Annealing Temp (°C) | Ref  |
|----------------|-------------------|---------------------------------|--------------------------------|---------------------|------|
| <i>hGNAT3</i>  | 386               | 5'-tctgggtatgtgccaaatga-3'      | 5'-ggcccagtgattctggaaa-3'      | 50                  | *1   |
| <i>hTAS2R3</i> | 1227              | 5'-aagagacaggtacagtgaagcaaca-3' | 5'-cagtcagtggttctctctactgat-3' | 55                  | [47] |
| <i>hTAS2R4</i> | 1179              | 5'-ctgttcagtcctgctgaagacaga-3'  | 5'-gacatagtattgggtttgatccgt-3' | 55                  | [47] |
| <i>hTAS2R5</i> | 1169              | 5'-ctgttcagtcctgctgaagacaga-3'  | 5'-gacatagtattgggtttgatccgt-3' | 55                  | [47] |
| <i>hGAPDH</i>  | 226               | 5'-gaaggtgaaggtcggagtc-3'       | 5'-gaagatggtgatggatttc-3'      | 50                  | *2   |
| <i>hGNAT3</i>  | 127               | 5'-aatccagaagtgcagagga-3'       | 5'-aggcctgaattcctggatct-3'     |                     | *1   |
| <i>hTAS2R3</i> | 136               | 5'-tgctcccttaattgtgtcc-3'       | 5'-attctgatggccctcttg-3'       |                     | *3   |
| <i>hTAS2R4</i> | 111               | 5'-aaaatgccactggttctgg-3'       | 5'-ggaccagggtagcaactgaa-3'     |                     | *4   |
| <i>hTAS2R5</i> | 108               | 5'-gagtctctggtgcctctgg-3'       | 5'-ggataccgaatgctgctgtt-3'     |                     | *5   |
| <i>hGAPDH</i>  | 87                | 5'-tgcaccaccaactgcttagc-3'      | 5'-ggcatggactgtggtcatgag-3'    |                     | *2   |

\*1 *Homo sapiens GNAT3* (Gagust), mRNA: XM\_294370

\*2 *Homo sapiens GAPDH*, mRNA: XR\_018331

\*3 *Homo sapiens TAS2R3*, mRNA: NM\_016943

\*4 *Homo sapiens TAS2R4*, mRNA: NM\_016944

\*5 *Homo sapiens TAS2R5*, mRNA: NM\_018980
